# Supplementary material for: Role of mutations and post-translational modifications in systemic AL amyloidosis studied by cryo-EM
Source: PubMed Central journal article supplement (PMC8571268; doi:10.1038/s41467-021-26553-9), 2021-11-05
Supplement: 41467_2021_26553_MOESM2_ESM.pdf [file 41467_2021_26553_MOESM2_ESM.pdf]

## Reporting Summary

Nature Portfolio wishes to improve the reproducibility of the work that we publish. This form provides structure for consistency and transparency in reporting. For further information on Nature Portfolio policies, see our [Editorial Policies](#) and the [Editorial Policy Checklist](#).

Please do not complete any field with "not applicable" or n/a. Refer to the help text for what text to use if an item is not relevant to your study.

For final submission: please carefully check your responses for accuracy; you will not be able to make changes later.

### Statistics

For all statistical analyses, confirm that the following items are present in the figure legend, table legend, main text, or Methods section.

- | n/a                                 | Confirmed                                                                                                                                                                                                                                                                                      |
|-------------------------------------|------------------------------------------------------------------------------------------------------------------------------------------------------------------------------------------------------------------------------------------------------------------------------------------------|
| <input type="checkbox"/>            | <input checked="" type="checkbox"/> The exact sample size ( $n$ ) for each experimental group/condition, given as a discrete number and unit of measurement                                                                                                                                    |
| <input type="checkbox"/>            | <input checked="" type="checkbox"/> A statement on whether measurements were taken from distinct samples or whether the same sample was measured repeatedly                                                                                                                                    |
| <input type="checkbox"/>            | <input checked="" type="checkbox"/> The statistical test(s) used AND whether they are one- or two-sided<br><i>Only common tests should be described solely by name; describe more complex techniques in the Methods section.</i>                                                               |
| <input checked="" type="checkbox"/> | <input type="checkbox"/> A description of all covariates tested                                                                                                                                                                                                                                |
| <input checked="" type="checkbox"/> | <input type="checkbox"/> A description of any assumptions or corrections, such as tests of normality and adjustment for multiple comparisons                                                                                                                                                   |
| <input type="checkbox"/>            | <input checked="" type="checkbox"/> A full description of the statistical parameters including central tendency (e.g. means) or other basic estimates (e.g. regression coefficient) AND variation (e.g. standard deviation) or associated estimates of uncertainty (e.g. confidence intervals) |
| <input type="checkbox"/>            | <input checked="" type="checkbox"/> For null hypothesis testing, the test statistic (e.g. $F$ , $t$ , $r$ ) with confidence intervals, effect sizes, degrees of freedom and $P$ value noted<br><i>Give <math>P</math> values as exact values whenever suitable.</i>                            |
| <input checked="" type="checkbox"/> | <input type="checkbox"/> For Bayesian analysis, information on the choice of priors and Markov chain Monte Carlo settings                                                                                                                                                                      |
| <input checked="" type="checkbox"/> | <input type="checkbox"/> For hierarchical and complex designs, identification of the appropriate level for tests and full reporting of outcomes                                                                                                                                                |
| <input type="checkbox"/>            | <input checked="" type="checkbox"/> Estimates of effect sizes (e.g. Cohen's $d$ , Pearson's $r$ ), indicating how they were calculated                                                                                                                                                         |

*Our web collection on [statistics for biologists](#) contains articles on many of the points above.*

### Software and code

Policy information about [availability of computer code](#)

- |                 |                                                                                                                                                                                                                                                                                                                             |
|-----------------|-----------------------------------------------------------------------------------------------------------------------------------------------------------------------------------------------------------------------------------------------------------------------------------------------------------------------------|
| Data collection | <input type="text" value="SerialEM v3.7"/>                                                                                                                                                                                                                                                                                  |
| Data analysis   | <input type="text" value="Relion v3.0, MotionCor2, Gctf v1.06, Coot v0.8.9, PHENIX v1.16, Molprobit, IMOD 4.9.0, Fiji (ImageJ) 1.52, UCSF Chimera v1.14, XCalibur 2.2 SP1.48, Peaks AB Software, Peaks X software suite, mMass, MATLAB 2019, MASH Explorer, TANGO v2.1, WALTZ, FoldAmyloid, Aggrescan, PASTA 2.0, abYsis"/> |

For manuscripts utilizing custom algorithms or software that are central to the research but not yet described in published literature, software must be made available to editors and reviewers. We strongly encourage code deposition in a community repository (e.g. GitHub). See the Nature Portfolio [guidelines for submitting code & software](#) for further information.

### Data

Policy information about [availability of data](#)

All manuscripts must include a [data availability statement](#). This statement should provide the following information, where applicable:

- Accession codes, unique identifiers, or web links for publicly available datasets
- A description of any restrictions on data availability
- For clinical datasets or third party data, please ensure that the statement adheres to our [policy](#)

The datasets used during the current study are available from public repositories and/or from the corresponding author on reasonable request. The cryo-EM map of the FOR001 fibrils was deposited in the Electron Microscopy Data Bank (<https://www.ebi.ac.uk/pdbe/emdb/>) with the accession code EMD-12570. The coordinates of the corresponding atomic model were deposited in the PDB (<https://www.rcsb.org/>) under the accession code 7NSL. The cryo-EM data of the FOR001 fibrils were deposited on EMPIAR (<https://www.ebi.ac.uk/pdbe/emdb/empiar/>) with the accession code EMPIAR-10730. The following published PDB structures were used in the manuscript: 4ODH 10.2210/pdb4ODH/pdb, 6IC3 10.2210/pdb6IC3/pdb, 6Z1O 10.2210/pdb6Z1O/pdb, 6HUD 10.2210/pdb6HUD/pdb, 5JZ7 10.2210/pdb5JZ7/pdb, 6QB6 10.2210/pdb6QB6/pdb, 6Q0E 10.2210/pdb6Q0E/pdb, 7JVA 10.2210/pdb7JVA/pdb, 5MUD 10.2210/pdb5MUD/pdb. The accession codes for the IGLV1-51\*02 segment from the IMGT database is M30446 <http://www.imgt.org/ligmdb/view?id=M30446> and from the VBase2 humlGLV015 <http://www.vbase2.org/vgene.php?id=humlGLV015>. The IGLJ2 and IGLJ3 gene segments were taken from GenBank with the Gene IDs 28832 <https://www.ncbi.nlm.nih.gov/gene/28832> and 28831 <https://www.ncbi.nlm.nih.gov/gene/28831>, respectively. Source data are provided with this paper for the following figures: Fig. 1c, Fig. 5c,d,e, Supplementary Figure 1a, Supplementary Figure 2, Supplementary Figure 5d and Supplementary Figure 6.

## Field-specific reporting

Please select the one below that is the best fit for your research. If you are not sure, read the appropriate sections before making your selection.

Life sciences  Behavioural & social sciences  Ecological, evolutionary & environmental sciences

## Life sciences study design

All studies must disclose on these points even when the disclosure is negative.

Sample size

Data exclusions

Replication

Randomization

Blinding

## Reporting for specific materials, systems and methods

We require information from authors about some types of materials, experimental systems and methods used in many studies. Here, indicate whether each material, system or method listed is relevant to your study. If you are not sure if a list item applies to your research, read the appropriate section before selecting a response.

### Materials & experimental systems

n/a  Involved in the study

Antibodies

Eukaryotic cell lines

Palaeontology and archaeology

Animals and other organisms

Human research participants

Clinical data

Dual use research of concern

### Methods

n/a  Involved in the study

ChIP-seq

Flow cytometry

MRI-based neuroimaging

## Human research participants

Policy information about [studies involving human research participants](#)

Population characteristics

Recruitment

Ethics oversight

Note that full information on the approval of the study protocol must also be provided in the manuscript.
